# Supplementary material for: Evolutionary differentiation of androgen receptor ohnologs is responsible for the development of androgen-dependent unique sexual characteristics in a teleost fish
Source: Research Square preprint supplement (doi:10.21203/rs.3.rs-1848626/v1), 2022-07-29
Supplement: Supplementary file 1 [file 1eacdd361fd4749063b98189.docx]

**Supplementary Figure legends**

**Supplementary Fig. 1**

**Identification and verification of *ara/arb* TILLING mutant medaka**

**a** Protein structures of medaka Ara and Arb and positions of the mutations identified in this study.

**b** WT and heterozygous mutant (+/-) medaka sequence data. Serine (S) in the WT was altered to a stop codon by cytosine-to-adenine substitution in *ara* (+/-). Leucine (L) in WT was altered to a stop codon by a thymine-to-adenine substitution in *arb* (+/-).

**c** Alignment of protein sequences of vertebrates Ars.Multiple alignments of amino acid sequences of the LBD surrounding the mutated amino acid with vertebrate Ars. Arrowheads indicate the premature stop codon of obtained *ara/arb* TILLING mutant medaka. human AR: NM_000044.2; chicken Ar: AB193190; brown-banded bambooshark Ar: AB213019; Nile tilapia Ara: AB045211, Nile tilapia Arb: AB045212

medaka Ara: AB252233; medaka Arb: AB252679.

**d** Loss of ligand-dependent transactivation of *ara* and *arb* mutant alleles. COS-7 cells were transfected with an expression construct for either *ara*+, *ara*-, *arb*+ or *arb*- allele (pCMV-medaka Ara+, pCMV-medaka Ara-, pCMV-medaka Arb+, or pCMV-medaka Arb-), and pGL3 PRE/ARE tk Luc as a reporter plasmid. pRL-SV40 was used as an internal control to calculate transfection efficiency. Transfected cells were treated with 10-8 M 11KT or vehicle alone as a control. The relative transcriptional activity of Ar is shown as values normalised to pRL-induced activities. Bars represent the mean and SD. Statistical differences were assessed using the Mann–Whitney U test. *P < 0.05.

**Supplementary Fig. 2**

**Ar mutant females exhibited normal fecundity**

**a** Percentage of fertilisation of ovulated oocytes from WT, *ara* KO, *arb* KO, and *ar* DKO females in natural mating with WT males (n = 4 for WT females, *ara* KO females, *arb* KO females, and *ar* DKO females, respectively).

**b** Frequency of mating tests in which a female laid eggs within 30 min after mating started with a WT male.

**c** Total number of fertilised eggs in 10 days.

For each female, the average value of mating tests in 10 days with distinct males was calculated. Statistical differences were assessed using the Kruskal–Wallis test followed by the Steel test (a–c).

**Supplementary Fig. 3**

**Differentiation of medulla surrounding the sperm duct near the opening of the digestive tract in *ar* KO males**

Representative micrographs of Masson/trichrome-stained sections of the urogenital region of WT, *ara* KO, *arb* KO, and *ar* DKO males. Scale bars represent 200 m. The urethra, sperm duct, enlarged medulla surrounding the sperm duct, and digestive tract are indicated by *, arrowhead, arrow, and #, respectively.

**Supplementary Fig. 4**

**Reduced expression of *lef1* gene expression in anal fin of *ar* DKO males.**

The graph showed the expression level of *lef1* relative to *rpl7* in the posterior half of the anal fin of WT, *ara* KO, *arb* KO, and *ar* DKO medaka (n = 3 for each genotype). Statistical differences were assessed using Bonferroni's multiple t-tests. *p < 0.05.

**Supplementary Fig. 5**

**Reduced reproductive success of *ara* KO males and *arb* KO males compared with WT males**

Percentage of mating success of WT, *ara* KO, and *arb* KO males in the mate choice tests.The mate choice test was performed using a round-robin tournament with five males.

The chi-squared (χ2) test of independence was used to assess whether the mutation had a significant effect on mating success.

**Supplementary Fig. 6**

**Gene ontology (GO) enrichment analysis of the differentially expressed genes between WT males and *ar* DKO males**

Significantly enriched pathways (hypergeometric test followed by false discovery rate (FDR) correction; FDR cutoff < 0.05) are shown. Colours indicate FDR values. Each dot size represents the number of genes in each pathway, including differentially expressed genes.

**Supplementary Fig. 7**

**Gene ontology (GO) enrichment analysis of the differentially expressed genes between WT males and *ara* KO males**

Significantly enriched pathways (hypergeometric test followed by false discovery rate (FDR) correction; FDR cutoff < 0.05) are shown. Colours indicate FDR values. Each dot size represents the number of genes in each pathway, including differentially expressed genes.

**Supplementary Fig. 8**

**Gene ontology (GO) enrichment analysis of the differentially expressed genes between WT males and *arb* KO males**

Significantly enriched pathways (hypergeometric test followed by false discovery rate (FDR) correction; FDR cutoff < 0.05) are shown. Colours indicate FDR values. Each dot size represents the number of genes in each pathway, including differentially expressed genes.

**Supplementary Table 1.**

Primers used in this study are listed.

**Supplementary Movie 1**

**Aggressive male-male competition**

Two WT males were placed in the same tank as a WT female and recorded from the top of the tank using a high-speed camera system at 300 frames per second with a resolution of 800×600 pixels. This movie file is a slow-motion replay at 30 frames per second.

**
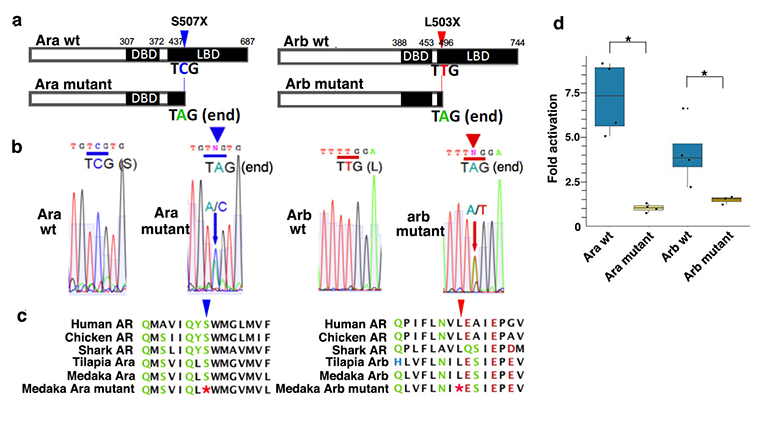
**

**Supplementary Fig. 1**

**
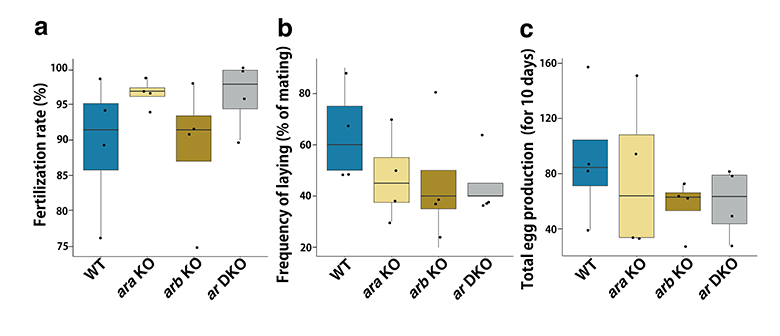
**

**Supplementary Fig. 2**

**
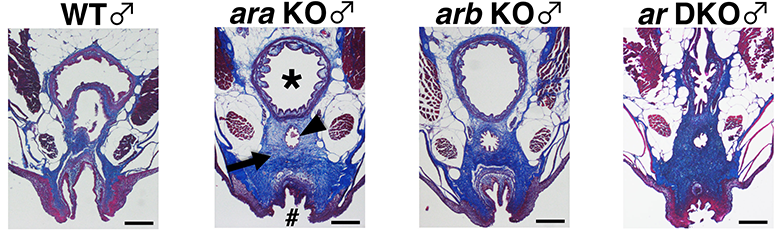
Supplementary Fig. 3**

**
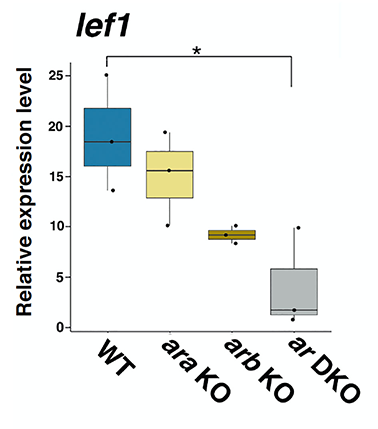
 Supplementary Fig. 4**

**
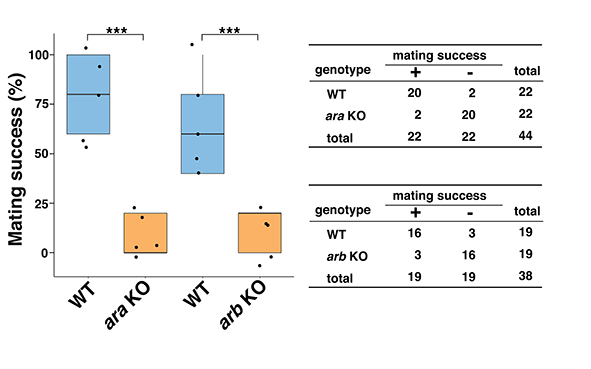
**

**Supplementary Fig. 5**

**
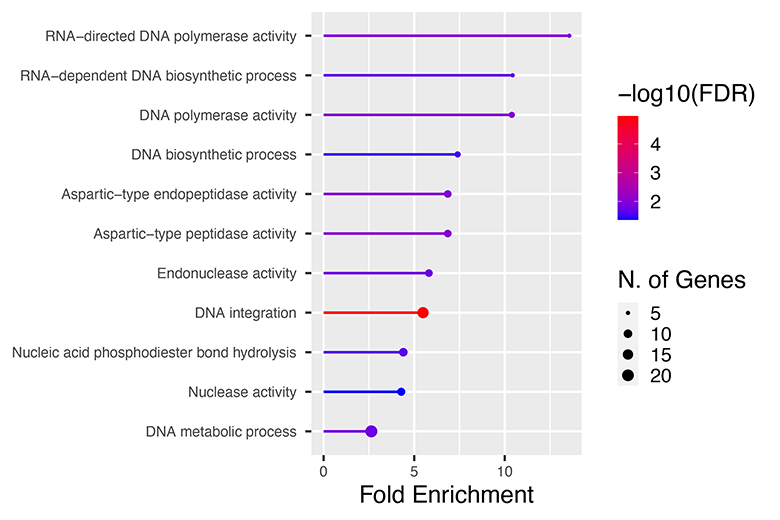
**

**Supplementary Fig. 6**

**
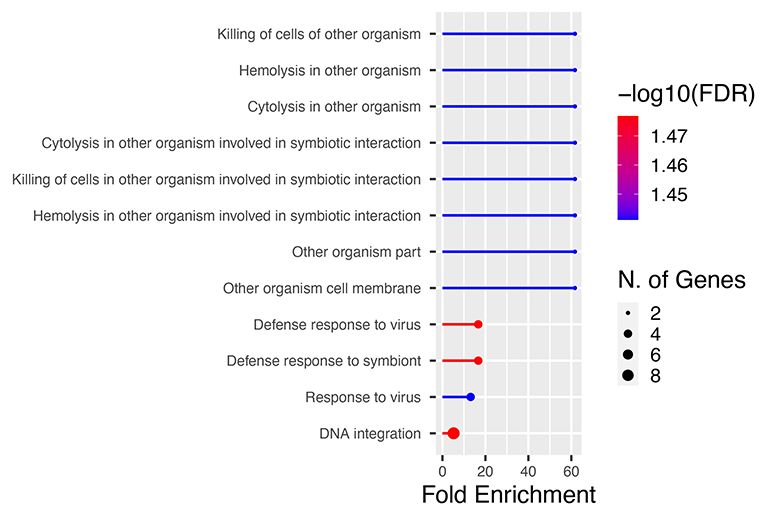
**

**Supplementary Fig. 7**

**
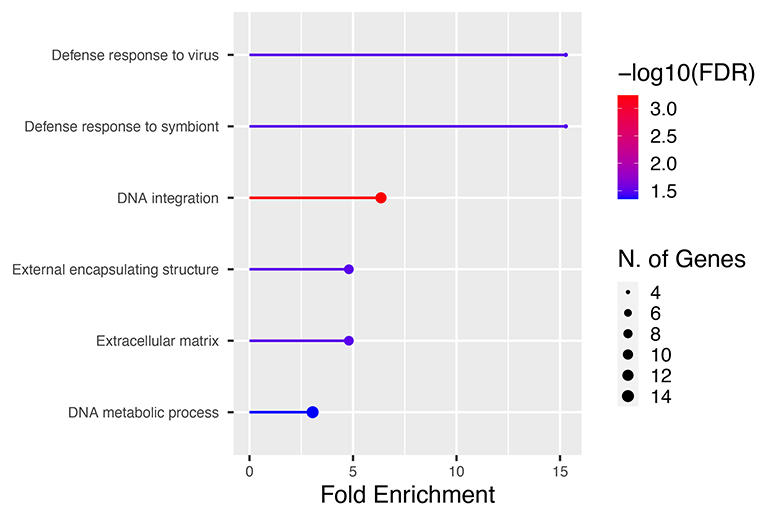
**

**Supplementary Fig. 8**

**
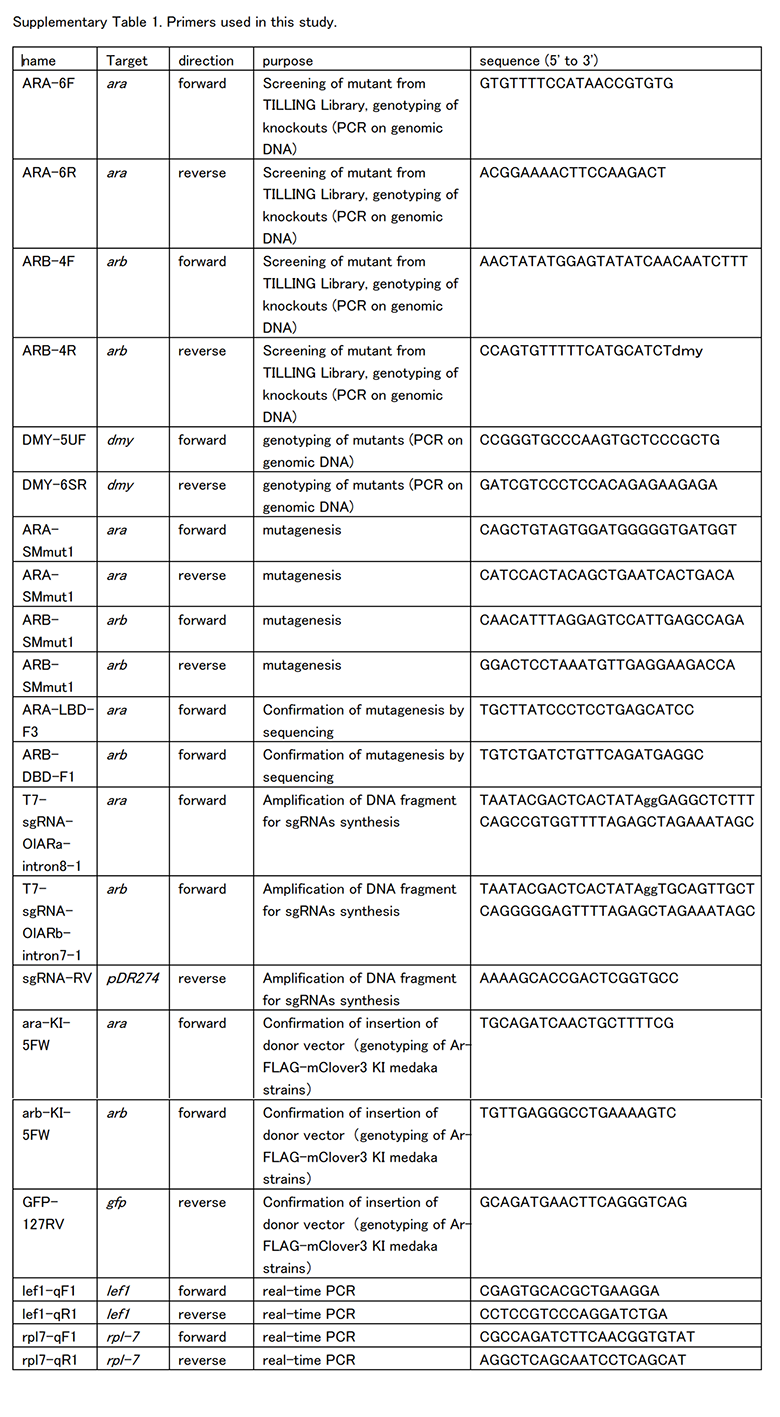
**

**Supplementary Table 1**

**Supplementary Movie 1**: it is attached as a separate file.
